# Supplementary material for: MORC3, a novel MIWI2 association partner, as an epigenetic regulator of piRNA dependent transposon silencing in male germ cells
Source: PubMed Central journal article supplement (PMC8516955; doi:10.1038/s41598-021-98940-7), 2021-10-14
Supplement: 41598_2021_98940_MOESM1_ESM.pdf [file 41598_2021_98940_MOESM1_ESM.pdf]

**Supplementary Information**  
**Supplementary Figure S1**

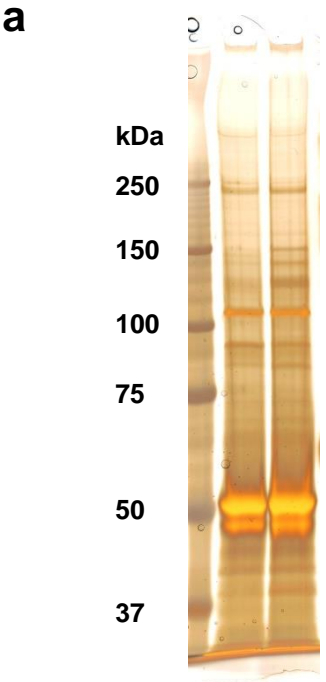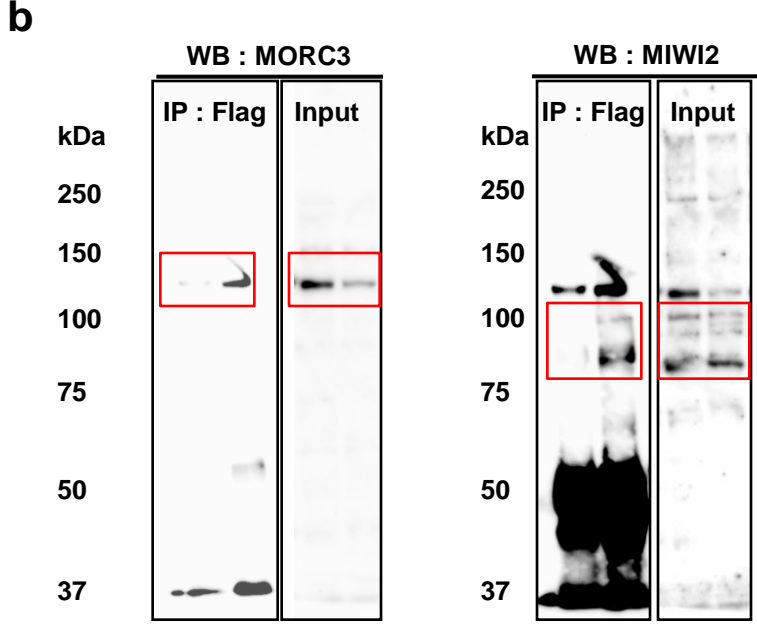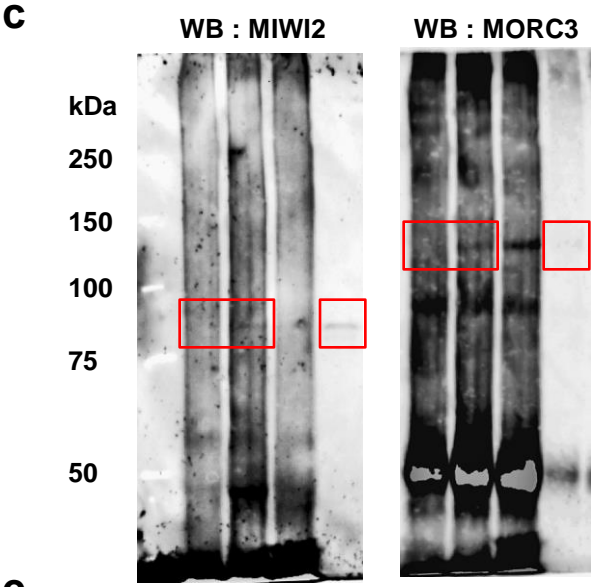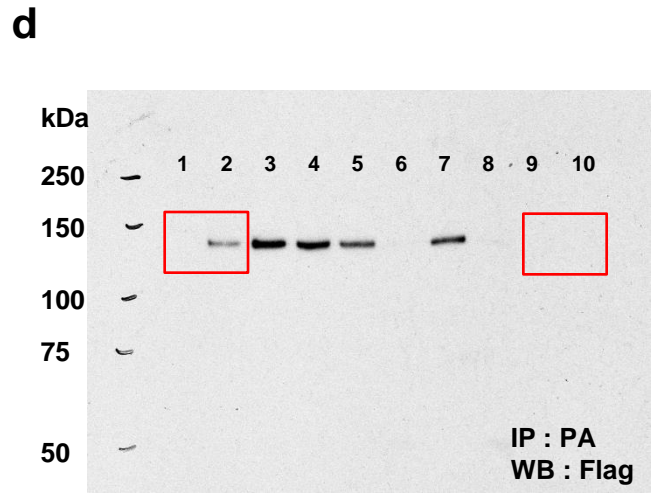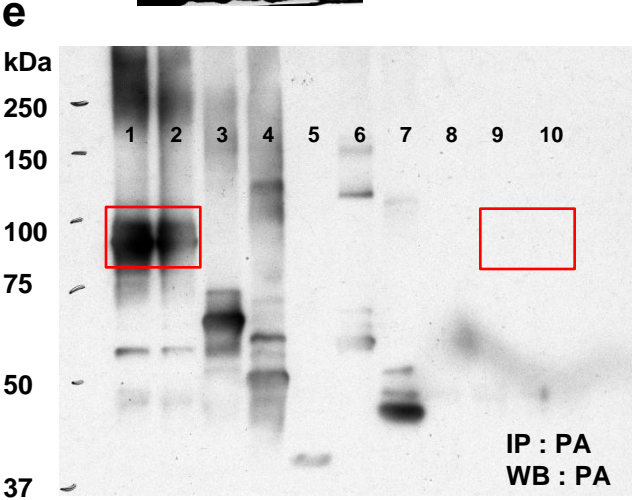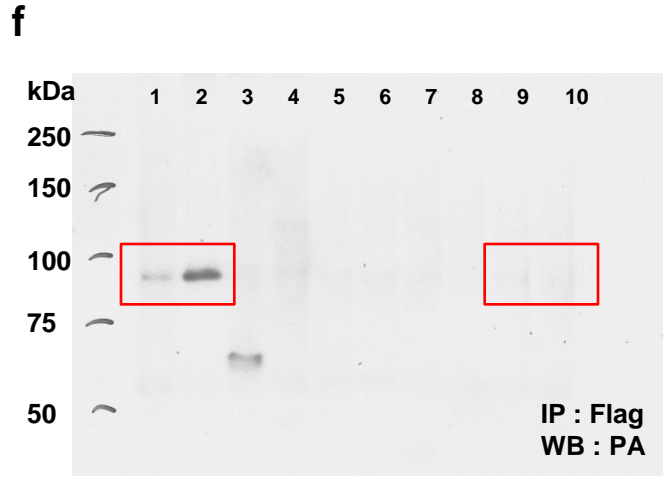

**Supplementary Figure S1**

**g**

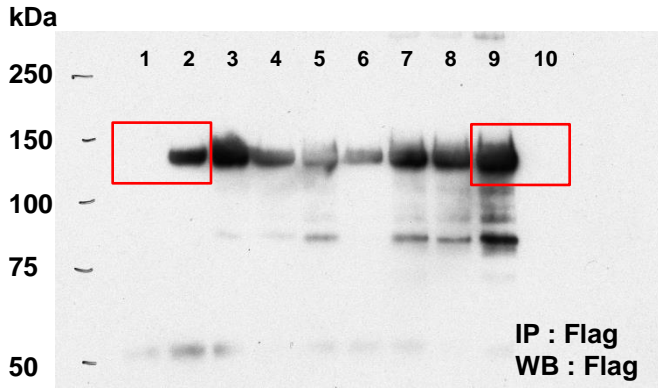

**h**

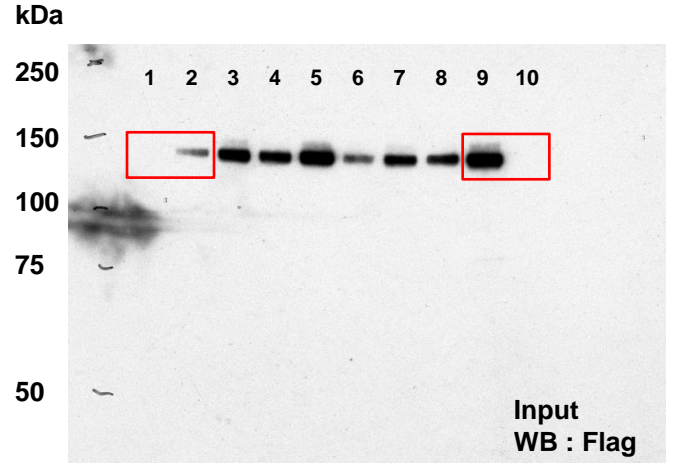

**i**

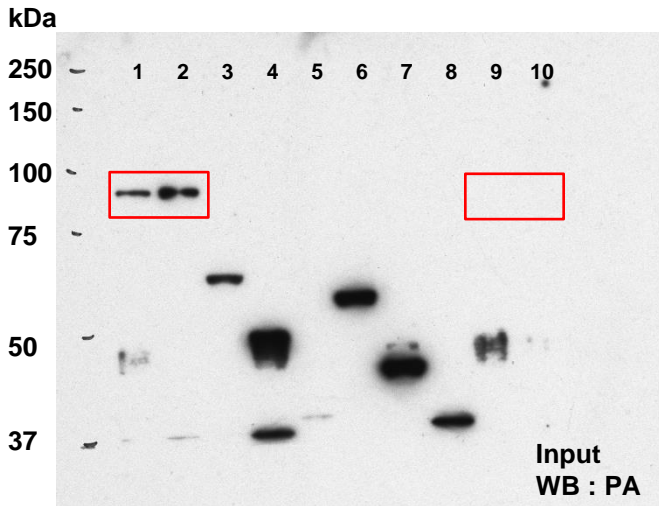

**j**

|              |   |   |   |
|--------------|---|---|---|
| MILI-Myc-His | + | + | - |
| Flag-MORC3   | - | + | + |

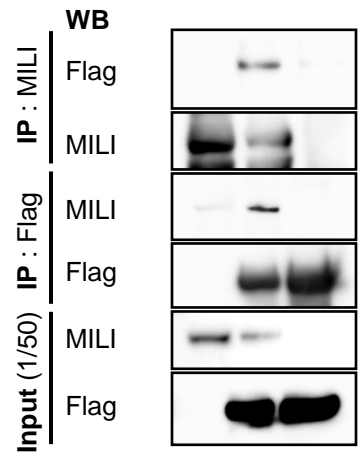

Supplementary Figure S1

**k**

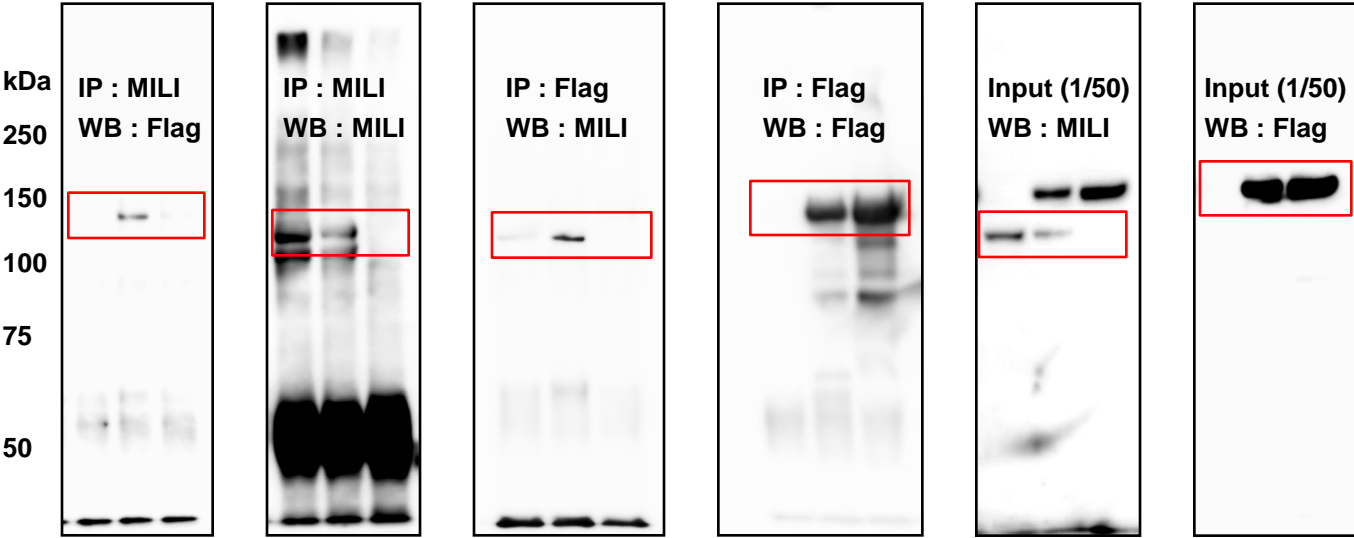

**l**

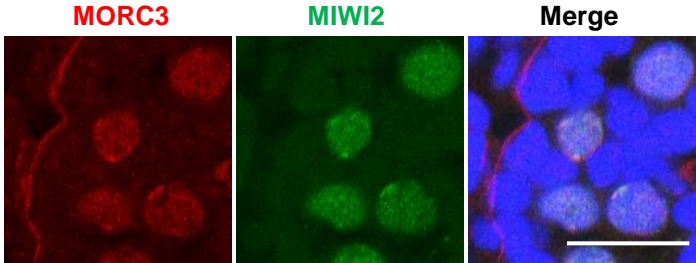

# Supplementary Figure S2

**a**

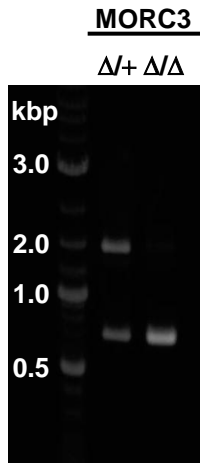

**b**

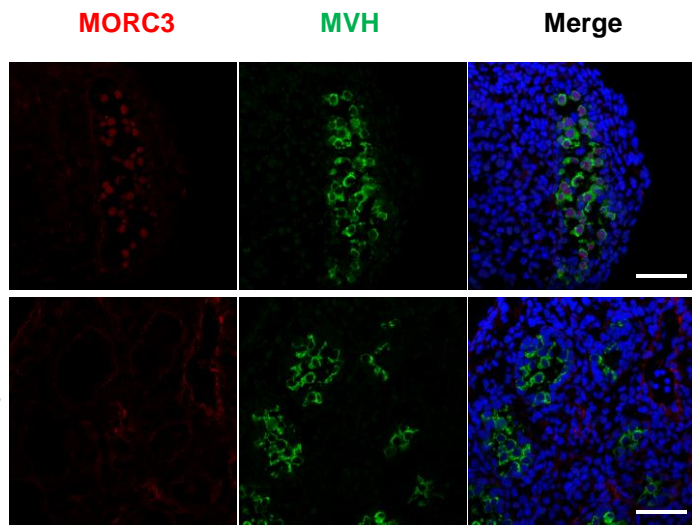

E14.5 testis

**c**

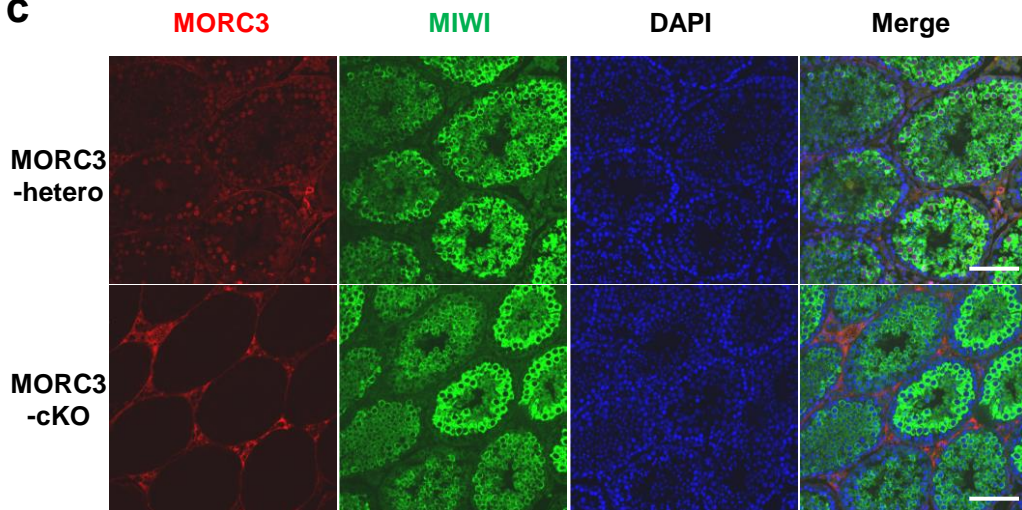

**d**

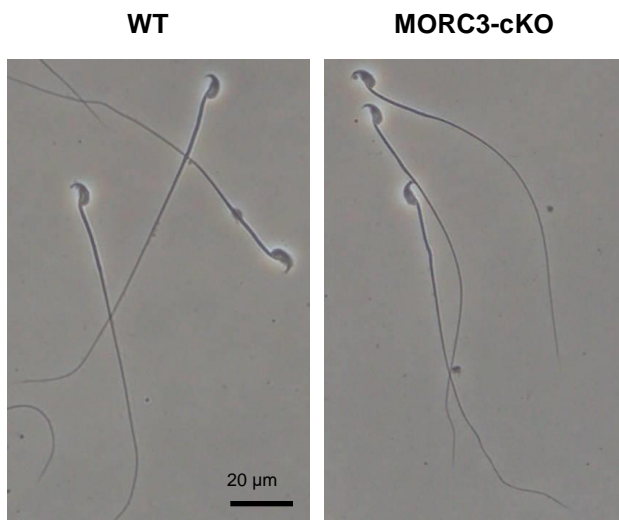

**e**

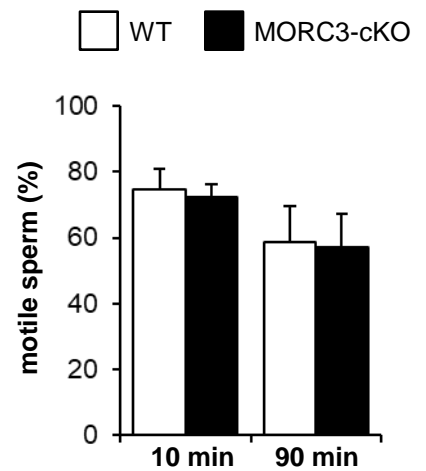

## Supplementary Figure S2

f

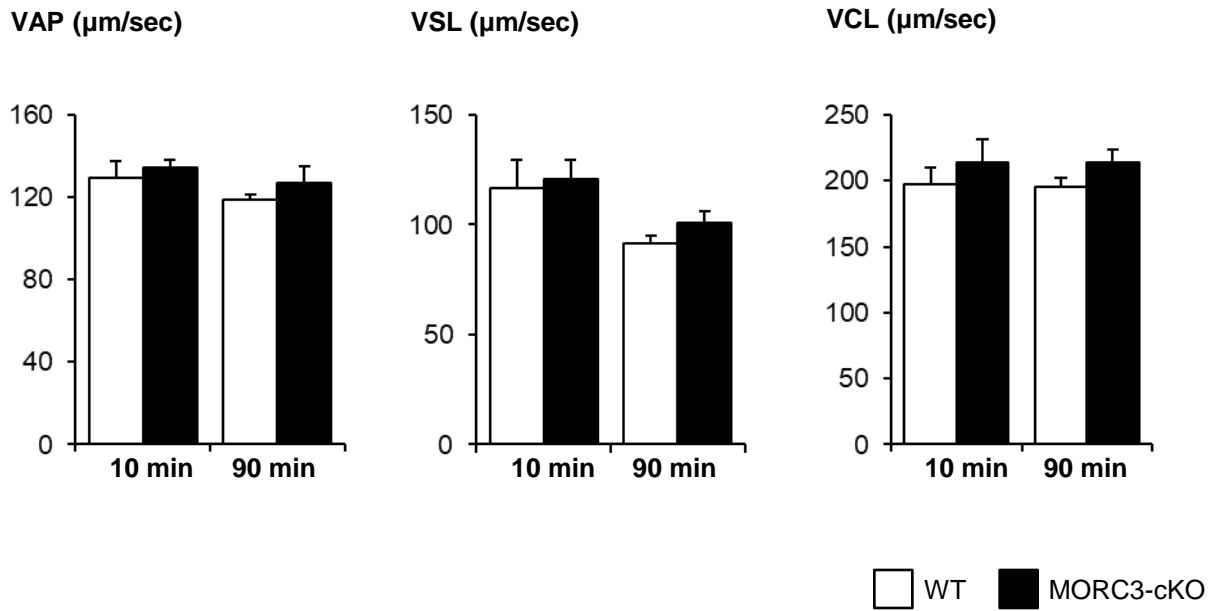

g

|           | ♂ No. | plug (No.) | birth (No.) | litter size       |
|-----------|-------|------------|-------------|-------------------|
| MORC3-cKO | #116  | 31         | 2           | 10,7              |
|           | #118  | 26         | 9           | 7,7,7,5,5,6,1,6,4 |
|           | #120  | 26         | 7           | 8,9,9,5,10,4,6    |
|           | #122  | 10         | 1           | 6                 |
|           | #125  | 31         | 0           |                   |
|           | #127  | 5          | 4           | 9,8,7,6           |
|           | #198  | 15         | 4           | 6,8,8,7           |
|           | #203  | 17         | 0           |                   |
|           | #208  | 16         | 5           | 7,7,6,6,6         |
|           | #232  | 16         | 8           | 6,6,9,4,5,8,7,7   |
| #238      | 27    | 0          |             |                   |
| WT        | #1    | 8          | 8           | 7,9,9,6,6,10,9,8  |
|           | #2    | 5          | 4           | 8,9,7,5           |
|           | #3    | 5          | 4           | 7,7,6,9           |

Supplementary Figure S3

a

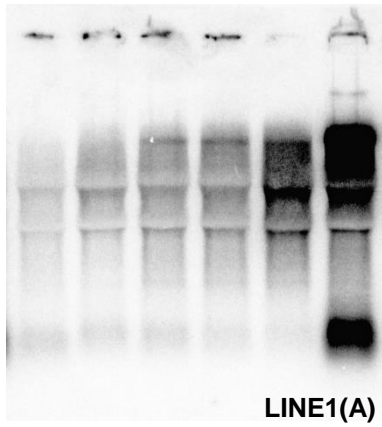

b

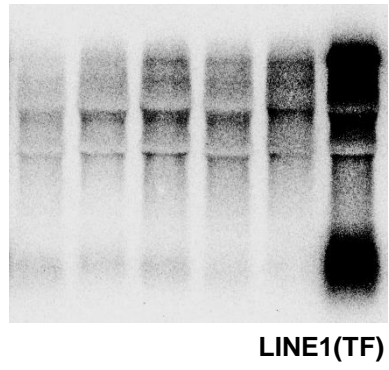

c

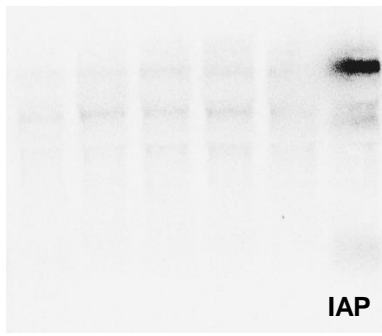

d

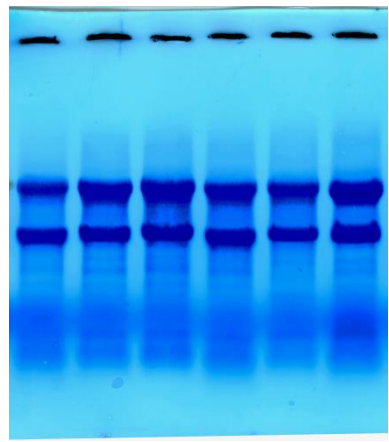

e

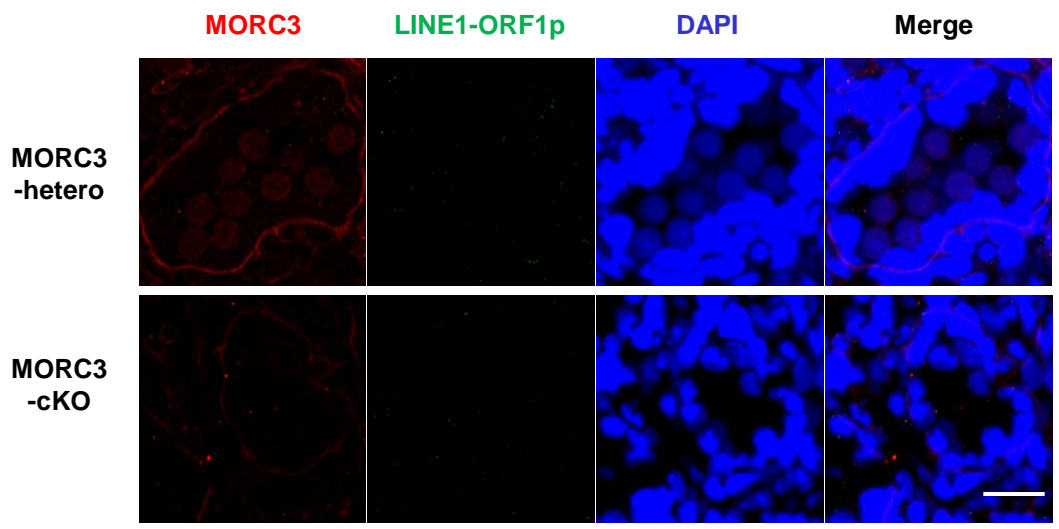

**Supplementary Figure S4**

**a**

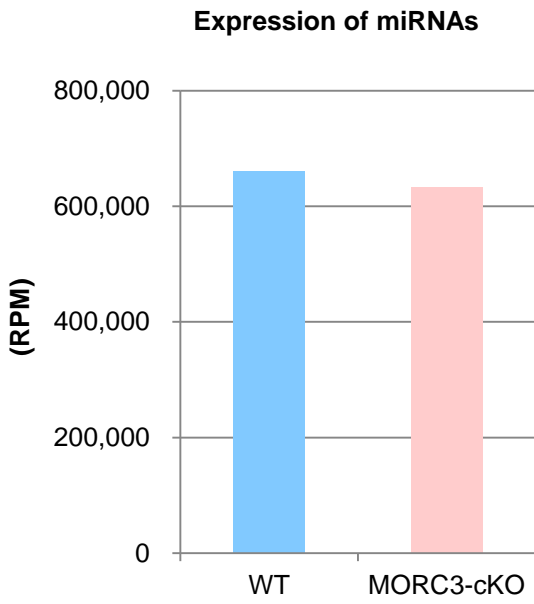

**b**

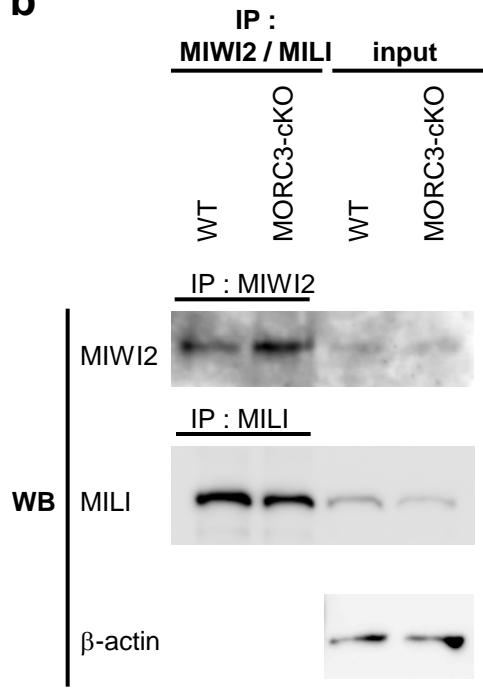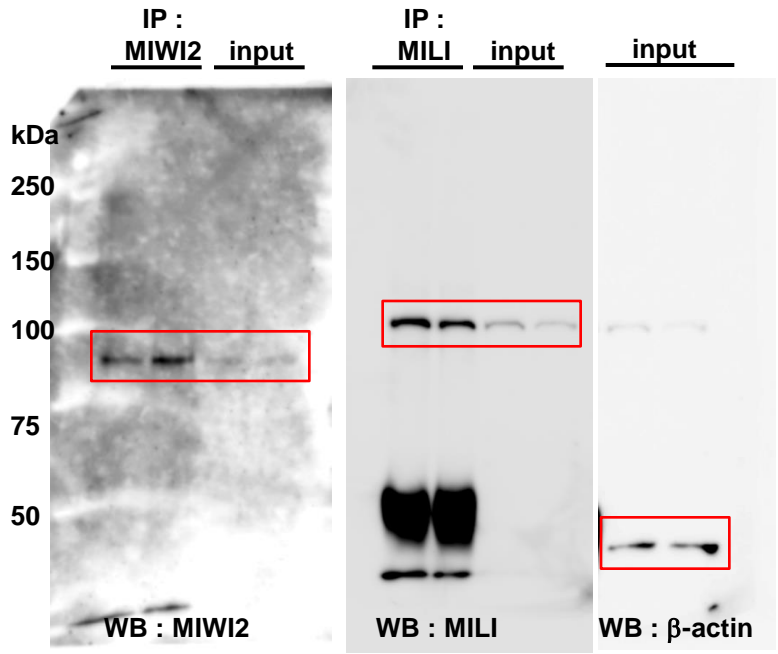

**Supplementary Figure S4**

**c**

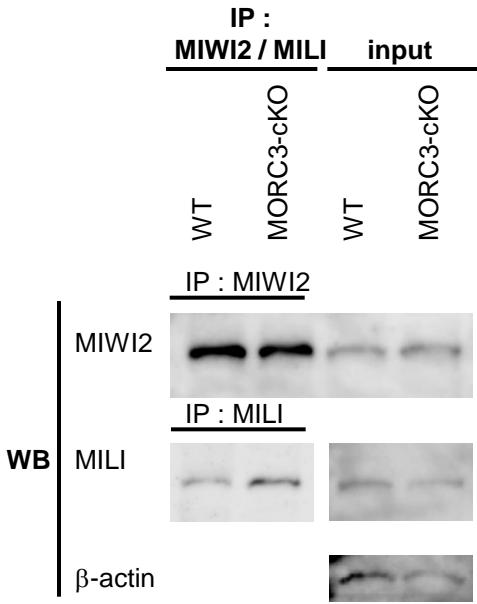

**d**

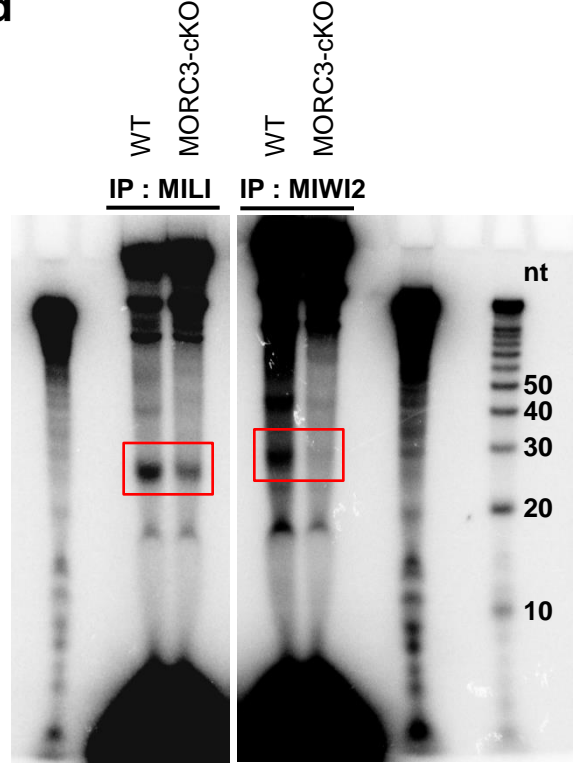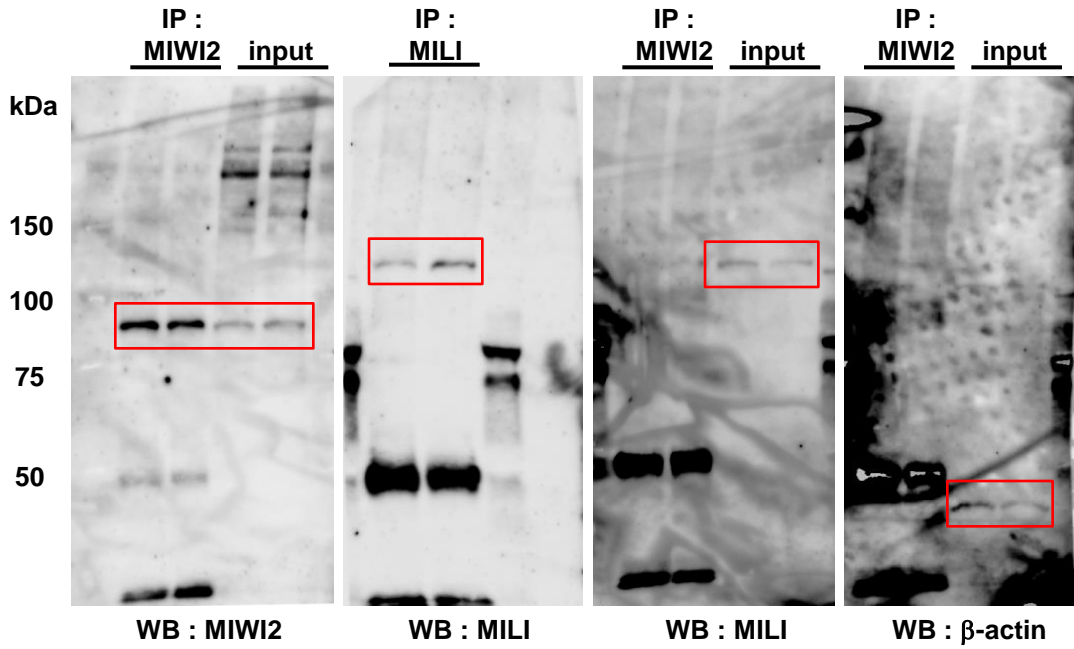



# Supplementary Figure S4

e

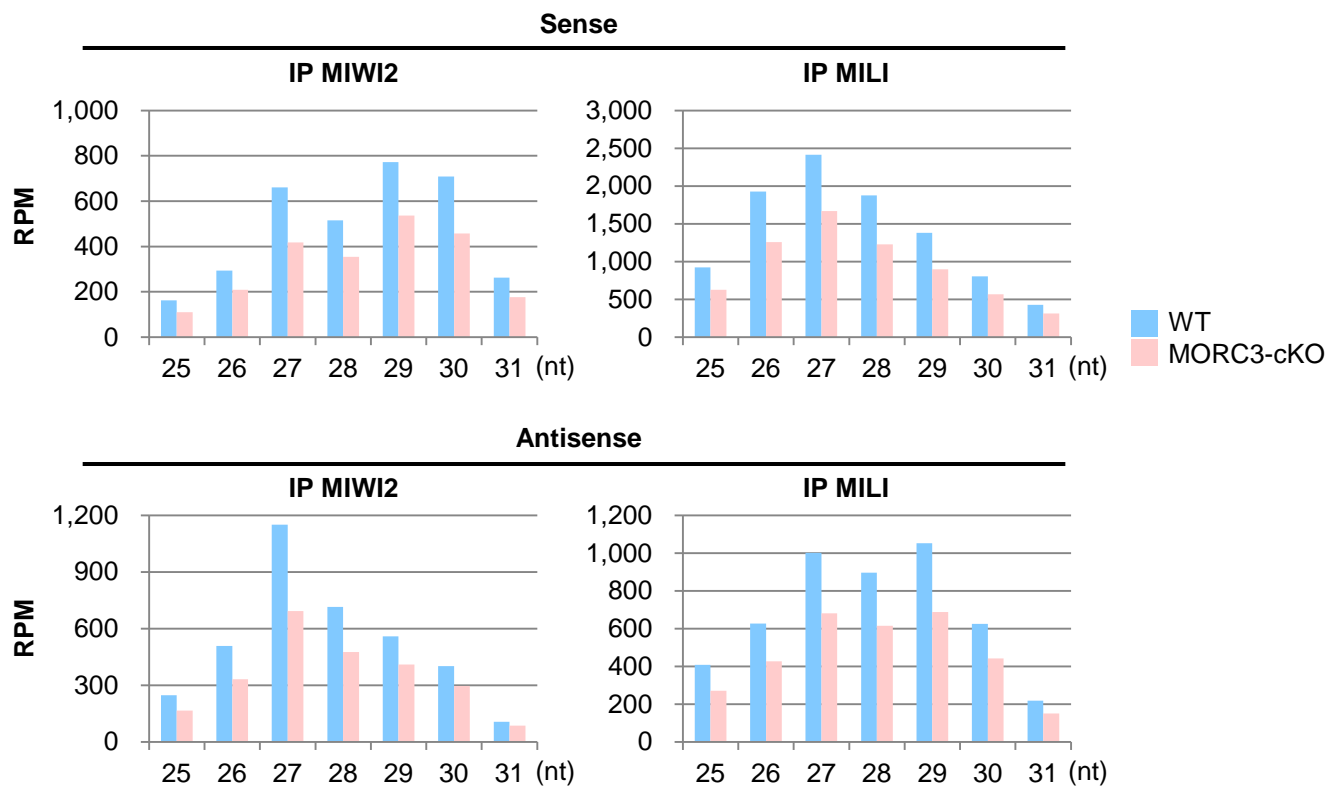

f

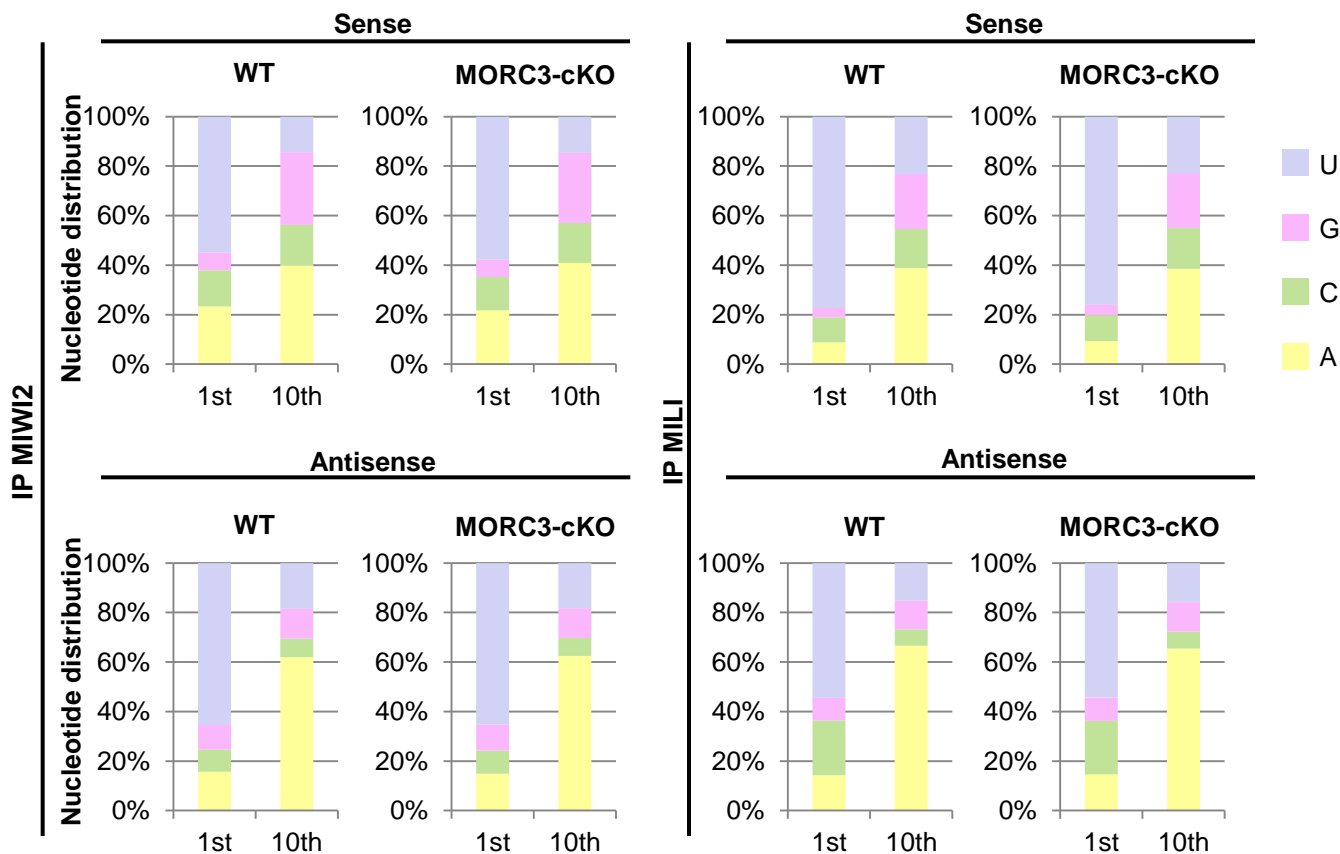

# Supplementary Figure S4

## g

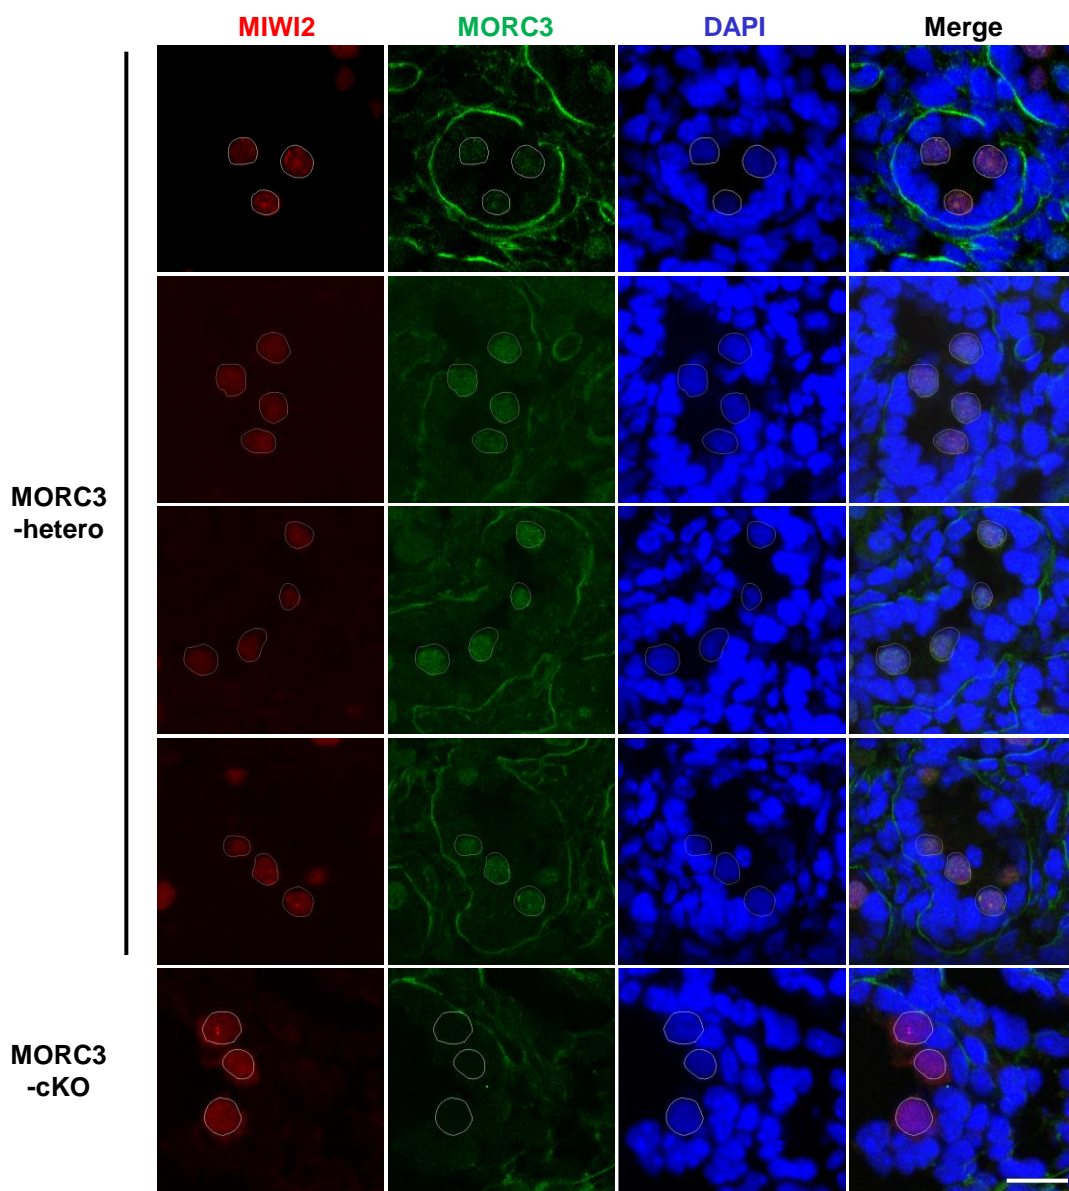

## h

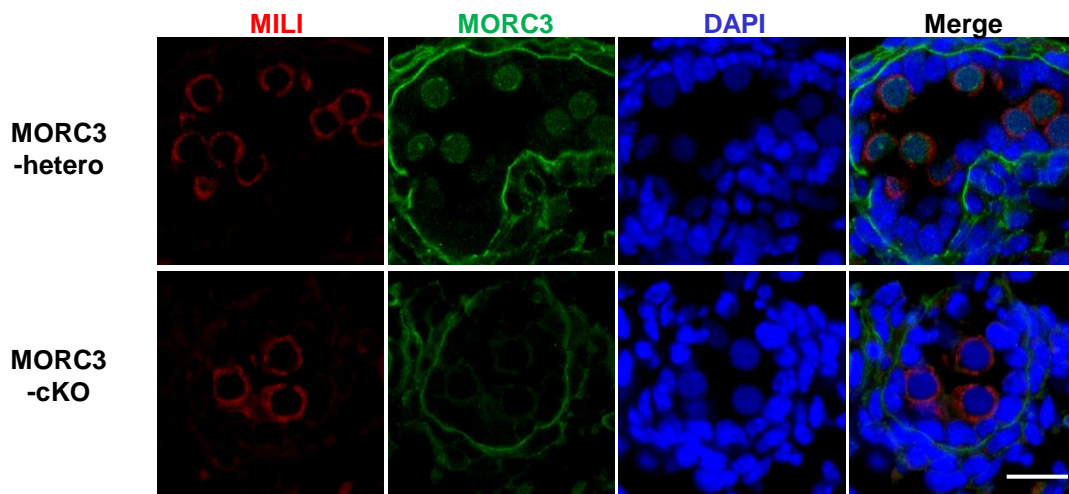

# Supplementary Figure S5

**a**

## Chr 8 piRNA cluster

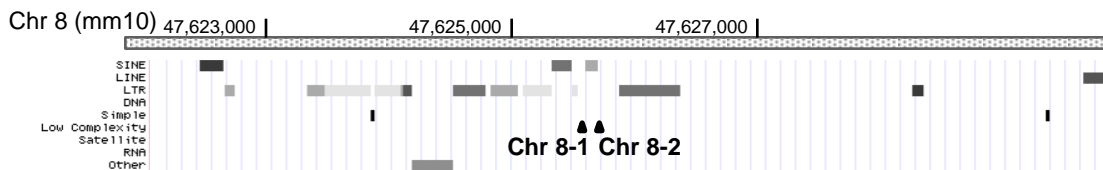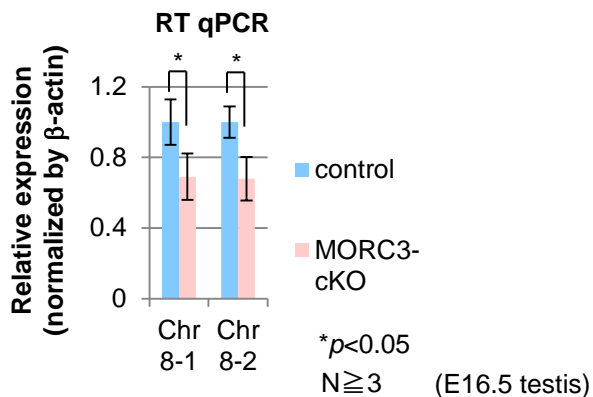

**b**

## Chr 7 (2) piRNA cluster

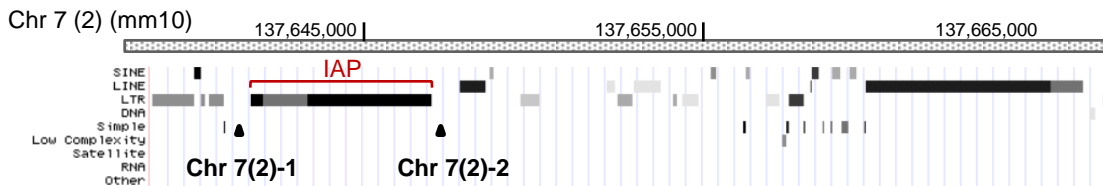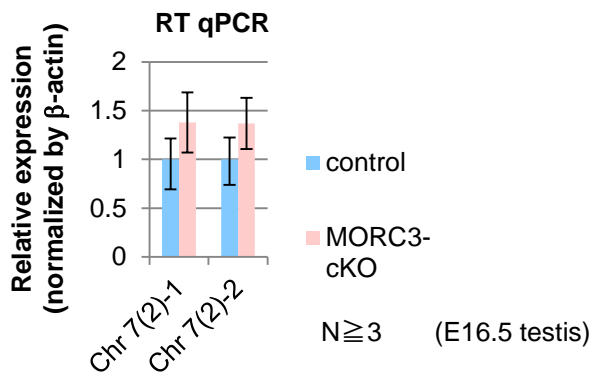

Supplementary Figure S5

**C**

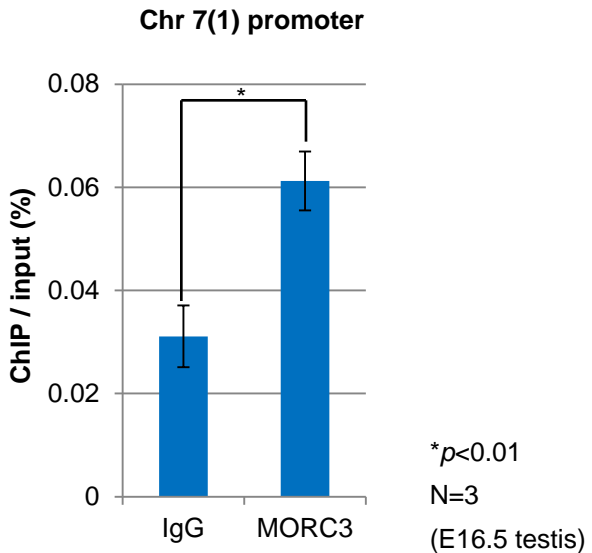

# Supplementary Figure S6

Morc3  
exon1-17

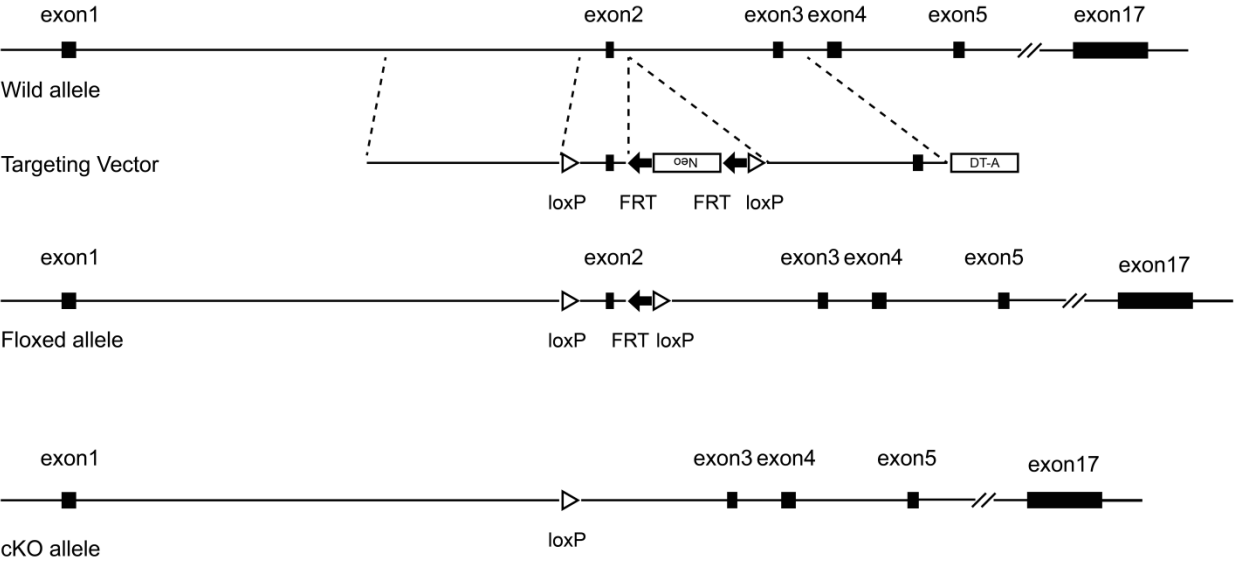



GCATTTCCCTTCTTTGTTCTAACTATCCCTAAGTCTGGTCCTAGAAGCTTCCCACCTC  
TGTACAATATAATCTTCCAAGGTGAATGATTCATTCTGGCTGCTCTTGGCTTCTGAC  
TGAATTGTTCTGCCTGGCCTCATACTAACTTTGACAATCTGTCCTAATCTCCTTCTT  
GTTCTCTGGCTTGTCTCTCTGTAACTATCTCTGTAGAACTGTCTCTGTGAAACTG  
CCTCACCACACATAACCACACACACATACACACACATCACGGGCACACACACT  
GCACACCTTTTTCTCACTCTCTCTGCTCTTTATGTAGTCTCTCTCCCTCTGCTGTTT  
TCATGTGAACTGAGAGTATCCTATCTCTGACAACTCTTTCTCTGATTGGTCACTTTG  
CCTCAATTAGATGCCACTTTCAAACATTGGCTGCTTCCCTTCTACAAACAAACCTT  
ACCTTCACTGTTAGGGATTAAAGATGTGTACTAAGGGTGTGTCTGTATTCTGGCTG  
GATCATATCTTTGGATGTGATCTCTTGCTAGAGCAGCCATGTTGCTGGATTAAAATT  
CCTCTACATACATAGTTCTAAAATTTGATATAGTTTGATTTATATGCCTTTTTTTTGTTA  
TATTCAAGAAATAATCCCAAATCAAATGTCTTGAAGCTTTTTTCTTCTAAAGTCTAA  
CAATTTATCTCTTATTCTAGGTGGGTTTTGTTGTTATTGATGGTGATGGCAGTGTTT  
TGTTTTGTTTTTTTTTTCCGAGACCAGATTTCTTTGTGTACCTCTGGCTGTCCTGGA  
ACTCACTCTGTAGACCAGGCTGGCCTCGAACTCAGAAATCTGCCTGCCTCTGCCTC  
CTGAGTGCTGGGATTAAAGGTGTGCGCCACCATGCTGGGCTATTTTAGGTTTTGAT  
CTATTTTGACGTAGTTTCTATGTATTGTAATGCAGGAATTTGGTTTGCCAGTTCCA  
TTTGTGAAAGGGCTTTTTCCAGTGAAGATTTTGGTGCCATATGTTCAAGGTCTGT  
TTGTAGGCTGCTGACTTGTGTGAGTCTGCCTGTCTTAGCGGTCCTTGGAGTCAGC  
TTGCCATGTCCATTCCTGTAGGGAGCTGATCTCTGCAGTTGTCTGGGTTTTCTGTA  
GCCACATCTCCAACAGCTCATGCTGGGTGCCAACTTAAAACCTTGCTTATGTTTTGAT  
ACTCTGCTTTCCTAGTGATGGAATTATAGGCTCTTGGTCACCATGCTCAGTTGTACG  
GAGTGCTGGGAGTTGAACCCAGGGCTTTGTGAATGTTAGGCAGGCGTTCCACCAA  
TTGAGCTACATCCCAACCTTTTGTGTTGGGGAAGTGGAGGCAAGAGGATTTCGAA  
GTTTAAGGGGAGTTCAAGGCTATCCTAGGATACGTGACCCTGTCTTTTTTTTTTTTT  
TTAAGTGTTTAAACTAACTTATTACGTGTGTATGCCACCAAATGTTCAAGAAATTAA  
GTTTCCTATTGGCTTCTCCTTCCATACCCTATTATTGAGAGTAAAGATGTACTTTAAA  
ACCTTGAAAACTTAAAAACCTTCATTTGTTGTTGGAAGTAATTTGAGATTCTTT  
GAAGAGGCCATGGATGTACACAGGCATAACTTCGTATAGCATAATTATACGAAGTT  
ATCACTGTTTGACTGTAAGAACTTGAATAGAAAATAAATCCAACCTTGAGGTGTC  
AGATATTTAGTCTCTGAAAGGCAACCAGCAAAGCCAGTAGATGAAGCAAAGCTAGT  
AAGGTCATTACACTGATGACCAAATACCTTCTTGGCAAGAGTTTGTCTCAAAGGAA  
GGATTTAGGAACCGGTGTTGGTGGGTCCTTAGGGTCTCGGTTGGGTCATTTAAAAC

AAGTCTTACAAAGGAATTGGGAATTAGGCAAGCTCTGCATTGTGGACACAAGGAGA  
CAGGGTTTTAAGAAGGGCTCCATGTGAACATTATTGAGTTATTTCTCCAGCCTTATC  
TTCCAGGAAGCCTCTAGGTTTTATCTTCTTGGAGCAAGCAATCAGACATTTTTTTAT  
TTGGCATCAATGTTGTTTTAACACAGTTTTTTATTGGGTCTTGTGCTTATAATTAAGGG  
CTGAATTAACCTTTATGAATTGTTGGTTTTGTTTCAGCTTTGCCCCGAAGTTTTTACAT  
ACAAATTCTACTAGTCATACCTGGCCGTTTCAGTGCAGTTGCTGAGTTAATAGGTATG  
TACATTGTTGTTTCATTATGTCTCTTAATTTGTAATTTTAGTTGACTTCAGAAAAATAA  
TATGCAATTATGCCTTTTTCAAAGTGTATCCTGAGTAACAGTGTGCATTCCTACTTAG  
ACGTCGTTTTAAGTTGCTTTCAGGTGGATTACTCCTCAGCCTTTCCTGTATTACTCAA  
GTGCTTCATTGCTTTTAGCACTTAATTTGCTAAGTTGACATAGCACTTACGGTGAAG  
TTCCTATACTTTCTAGAGAATAGGAACTTCGCGCCGCACACAAAAACCAACACAC  
AGATCATGAAAATAAAGCTCTTTTTATTGGTACCGAATTCGCCAGGGAGCTCTCAGA  
CGTCGCTTGGTCCGTCTTTATTCGAACCCAGAGTCCCGCTCAGAAGAACTCGTCA  
AGAAGGCGATAGAAGGCGATGCGCTGCGAATCGGGAGCGGCGATAACCGTAAAGCA  
CGAGGAAGCGGTCAGCCATTCGCCGCCAAGCTCTTCAGCAATATCACGGGTAGC  
CAACGCTATGTCTGATAGCGGTCCGCCACACCCAGCCGGCCACAGTCGATGAATC  
CAGAAAAGCGGCCATTTTCCACCATGATATTCGGCAAGCAGGCATCGCCATGGGTC  
ACGACGAGATCCTCGCCGTCGGGCATGCGCGCCTTGAGCCTGGCGAACAGTTCGG  
CTGGCGCGAGCCCCTGATGCTCTTCGTCCAGATCATCCTGATCGACAAGACCGGCT  
TCCATCCGAGTACGTGCTCGCTCGATGCGATGTTTCGCTTGGTGGTTCGAATGGGCA  
GGTAGCCGGATCAAGCGTATGCAGCCGCCGATTGCATCAGCCATGATGGATACTT  
TCTCGGCAGGAGCAAGGTGAGATGACAGGAGATCCTGCCCCGGCACTTCGCCCAA  
TAGCAGCCAGTCCCTTCCCGCTTCAGTGACAACGTCGAGCACAGCTGCGCAAGGA  
ACGCCCCGTCGTGGCCAGCCACGATAGCCGCGCTGCCTCGTCTGCAGTTCATTCA  
GGGCACCGGACAGGTCGGTCTTGACAAAAAGAACCGGGCGCCCCTGCGCTGACAG  
CCGGAACACGGCGGCATCAGAGCAGCCGATCGTCTGTTGTGCCAGTCATAGCCG  
AATAGCCTCTCCACCCAAGCGGCCGGAGAACCTGCGTGCAATCCATCTTGTTCAAT  
GGCCGATCCCATGGTTTTAGTTCCTCACCTTGTCGTATTATACTATGCCGATATACTAT  
GCCGATGATTAATTGTCAACACGTGCTGCTGCAGGTCGAAAGGCCCGGAGATGAG  
GAAGAGGAGAACAGCGCGGCAGACGTGCGCTTTTGAAGCGTGCAGAATGCCGGG  
CCTCCGGAGGACCTTCGGGCGCCCGCCCCGCCCCTGAGCCCGCCCCTGAGCCCGC  
CCCCGGACCCACCCCTTCCAGCCTCTGAGCCAGAAAGCGAAGGAGCAAAGCTG  
CTATTGGCCGCTGCCCCAAAGGCCTACCCGCTTCCATTGCTCAGCGGTGCTGTCCA



TCTGCACGAGACTAGTGAGACGTGCTACTTCCATTTGTCACGTCCTGCACGACGCG  
AGCTGCGGGGCGGGGGGAACTTCCTGACTAGGGGAGGAGTGGAAGGTGGCGCG  
AAGGGGCCACCAAAGAACGGAGCCGGTTGGCGCCTACCGGTGGATGTGGAATGTG  
TGCGAGGCCAGAGGCCACTTGTGTAGCGCCAAGTGCCCAGCGGGGCTGCTAAAGC  
GCATGCTCCAGACTGCCTTGGGAAAAGCGCCTCCCCTACCCGGTAGAATGAAGTTC  
CTTACTTTCTAGAGAATAGGAATTC AAGCTTATAACTTCGTATAGCATA CATTATA  
CGAAGTTATGAAAATATTTATATTTCTTATGAAAGTAAAAAATAAGAATTACACTTTC  
CAGTACTGTGTGTACCATCCAGAGAGGTTTCATCTTTCAGGTGGTATTGCATTTATG  
ACAGTTACTTCTTGATCCCTCTAAGGGAATGAGTATACTTAATTATCTACTGAGCA  
TGATAAGGTAAGGTACGTGCAGATTCGTATTAGGAGGTCATGATTTTCTTCAATTA  
GGTCTATGTTTTAAAAGGGGATTTGTTTTAAAAGATTTATTTATTATGTATACAATGT  
TCTGCCTGGAGAGAGAGAGAGACAGAGACAGAGACAGAGACAGACAGACA  
CACCGACTGACTGACTGACTAAGTGAGAATGGGAGAATGGTGTGGACTTTTTTCAA  
CCTCAAAGCTCACCCAGAAAGAGGGCCAGAAGAGAGCACAAGATCTCATTATAGAT  
GGATACGAGCCACTGTGTGGTTGCTGGGAATTGAACTCAGGACCTCTGGAAGAATA  
GCCAATGTTCTTAACCTCTGAACTATCTCCAGCCAAAGGGGGAAATTTGATTCTC  
AACGAATTTCCATATATATATATATATATATATATATATTTTTAAAGATTTATTTATTATA  
TGTAAGTACACTGTAGCTGTCTTCAGACACTCCAGAAGAGGGAGTCAGATCTTGTT  
ACGGATGGTTATGAGCCACCATGTGGTTGCTGGGATTTGAACTCTGGACCTTCGGA  
AGAGCAGTCAGGTGCTCTTACCCACTGAGCCATCTCACCAGCGCCCCCCCCCCCC  
CCCGTATATATTTTTAAATGAGTCTTAGTTTTTTGAGTTTTTTGAGTCAGCACTAGCA  
AACATTCGGGTGATTTCAATTTTTCTTCTCCCAAATCTACAATGGAAGTGCTATGAC  
CCTACAGGTATTCTCATATTTCAATTGTGTTTTGTTGGCAGCCGAGCAGAGATTTCCAT  
GCCTAACAGTGGTTTTCTTATGGTATTACCAAGCTTCAGTTTCTTTTTCTTTTTAA  
AATTGGTTTTATTTATTTTTTTATTTTATGTGCACTGTTTTGCCTGCATGGATGTCTCT  
AAGAGAATGTTGGATCCTCTGGAACTGGAGTTAGAGATAGTTGTGAGCTGCCATGT  
AGATGCTGGGAATTGAATCCCGGGTTCTCTGAAAGAGCATCTAATGCTCTTACTG  
CCAGCCTTCTCTCCTGCCCCAACTTAAGTTCTTTTTCTTTTTCTTTTTCTTTTCT  
TTTCTTTTTGGTTTTTTTTGTTTTTTGTTTTTTGAGACAGGGTTTTCTCTGTGTAGCTC  
TGGCTGTCCTGGAACTCACTTTGTAGACCAGGCTGGCCTCGAACTCAGAAATCCAC  
CTGCCTCTGCCTTCCGAGTGCTGGGATTAAGGCGTGTGCTACCACGCCTGGCCCC  
AACTTAAGTTCTTAATGAAATACTTTTTATCATTTCTGAAGTGGTTAGAAAAGATTA  
TTGTATGTTAATTTACAATTTAACTTATTTCTAATAAATATTTCAAAGTATGTTTCAAT

TAAGGGCTATTCAGATGGATCTTGAATAAATCACAAGTTGATTTTATTATTA  
ACTGATA  
ACAGTTAATTTTTTTTTTTTCATTTTTTTTAAAAAGATTTATTTATTTTATCTATGAGTACG  
CTGTTGCTGTCCTCTGACACACCAGAAGAGGGCATCAGATCCCATTATAGATGGTT  
GTGAGCCACCATGTGGTTGCTGGGAATTGAACTCAGGACCTCTGGAAGAGCACTT  
AGTGATCTTAACCACTGAGCCATCTCTCCAGCCCTTTTTCTTTCTATTTTTTTTTAAA  
GATTTATTTATAATTATACATAAGTACACTGTAGCTGTCTTCAGATGCACCAGAAGA  
GGGCGTCAGATCTTATTAGGGGTGGTTGTGAGCCACCTTGTGGTTGCTGGGATTTG  
AACTCAGGACCTTTGGAAGAGCAGTCACTGAGTGCTCTTACCTGCTGAGCCATCTC  
ACCAGCCCTCTCCAGCCCTTTTTTCATTTTTTAAATATATTCTTTTATGCCTGTTTGGAG  
AGAAATGAGTGTCTAAACAAGGATGTTAAAGGTGTTTGTAGATGAGAAGAGTGTA  
GTGATAGAGTCGTAAGCTGGAAGGACCTGACAAGGATCACAGAGATATTTGTAGGT  
GGTGGATCTGTGTGTGTGGCTCAGAGGAGAGTGATACTGCCTTCTCTTTTCTTTAT  
TAGCTGTTATTTAGCTTCTGGGTCAAGTGGTAGAGATCTGACACTCAGTTCTCACTT  
TCCCTTACAGACGGGCTTGTCTGTAGTCACCATTGTGAATGTGAGTGAGTAGTGGG  
TTTCACACTTGTGTGTGGTGGGTGCCAGTCTTTTCTCCTAGGAAATGAAGGCAGTT  
TATTCTCTTGTTTTCAAACCTTAGGAATTCCTAACCATTAGAGCTTTTAAAGTGGTA  
ATGCTGTTCTGTTGCTTGTACGCATTGTTCTAATTACAGTGGCTTTAAATGCAGGC  
TCAGAATTTCTCAAAACCCTGTTTTCCAGATAATGCTTATGATCCTGATGTGAATGC  
TAAACAGATCTGGATCGATAAAACAGTGATTAGTGACCATATATGCTTGACATTCAC  
TGATAATGGCAACGGGATGACAGCAGATAAGTTACATAAAAATGCTAAGGTAAAAAC  
GTGTTACAGTTTGGGAATGATGACTTCTGTCTTGAAAATTATCCTGTGTGCATGCAA  
AAAACCATTTTCATAGCCTTAAGCTTTGTCTTTAAAACCTGAAATGCTATGCCTACAG  
TGTGGTTAGGTCTTCTGTTATTTTCTACAGCCAGGCTATGCACACCACTTCATATCC  
CCACCATGCTCAGCATCCCTGCCCATATCTGCCTTACTTAAAATTCAGCATCCCTT  
TGGGATTGTATAATAGCTATTTTTACTTGGTATAAATTAGACTTAACTTGTGTTTCTA  
ATGGGATTTACTATTGGAGATGGGGAGTTGTCTTTAAAGAGACTGAAGAGGCATAA  
AATAGTCAGGTGTGTCTGCAGTGGGTGCTGAAGTGTACAGTAAAGCAGAGGGAGA  
GTCTAGATGCAGAAGCCTTCAGTTGTCTCCTAAATGTC**TACCGGGTAGGGGAGGCG**  
**CTTTTCCCAAGGCAGTCTGGAGCATGCGCTTTAGCAGCCCCGCTGGGCACTTGGC**  
**GCTACACAAGTGGCCTCTGGCCTCGCACACATTCCACATCCACCGGTAGGCGCAA**  
**CCGGCTCCGTTCTTTGGTGGCCCCTTCGCGCCACCTTCTACTCCTCCCCTAGTCAG**  
**GAAGTTCCCCCGCCCCGAGCTCGCGTCGTGCAGGACGTGACAAATGGAAGTA**  
**GCACGTCTCACTAGTCTCGTGCAGATGGACAGCACCGCTGAGCAATGGAAGCGGG**

TAGGCCTTTGGGGCAGCGGCCAATAGCAGCTTTGCTCCTTCGCTTTCTGGGCTCAG  
AGGCTGGGAAGGGGTGGGTCCGGGGGCGGGCTCAGGGGCGGGCTCAGGGGCGG  
GGCGGGCGCCGAAGGTCCTCCGGAGGCCCGGCATTCTGCACGCTTCAAAAGCGC  
ACGTCTGCCGCGCTGTTCTCCTCTTCCTCATCTCCGGGCCTTTCGACCTGCAGGTC  
CTCGCCATGGATCCTGATGATGTTGTTGATTCTTCTAAATCTTTTGTGATGGAAAAC  
TTTTCTTCGTACCACGGGACTAAACCTGGTTATGTAGATTCCATTCAAAAAGGTATA  
CAAAAGCCAAAATCTGGTACACAAGGAAATTATGACGATGATTGAAAAGGGTTTTA  
TAGTACCGACAATAAATACGACGCTGCGGGATACTCTGTAGATAATGAAAACCCGC  
TCTCTGGAAAAGCTGGAGGCGTGGTCAAAGTGACGTATCCAGGACTGACGAAGGT  
TCTCGCACTAAAAGTGGATAATGCCGAAACTATTAAGAAAGAGTTAGGTTTAAGTCT  
CACTGAACCGTTGATGGAGCAAGTCGGAACGGAAGAGTTTATCAAAAAGGTTCCGGT  
GATGGTGCTTCGCGTGTAGTGCTCAGCCTTCCCTTCGCTGAGGGGAGTTCTAGCGT  
TGAATATATTAATAACTGGGAACAGGCGAAAGCGTTAAGCGTAGAACTTGAGATTAA  
TTTTGAAACCCGTGGAAAACGTGGCCAAGATGCGATGTATGAGTATATGGCTCAAG  
CCTGTGCAGGAAATCGTGTCAAGGCGATCTCTTTGTGAAGGAACCTTACTTCTGTGG  
TGTGACATAATTGGACAAACTACCTACAGAGATTTAAAGCTCTAAGGTAAATATAAA  
ATTTTTAAGTGTATAATGTGTTAAACTACTGATTCTAATTGTTTGTGTATTTTAGATT  
CCAACCTATGGAAGTATGAATGGGAGCAGTGGTGGAAATGCAGATCCACTAGAGTC  
GATCGACTAGAGCTGGTACCGCGCCATTACCCTGTTATCCCTAGGCCGCCACCGC  
GGTGGGCTTCCTCGCTCACTGACTCGCTGCGCTCGGTCGTTCCGGCTGCGGCGAGC  
GGTATCAGCTCACTCAAAGGCGGTAATACGGTTATCCACAGAATCAGGGGATAACG  
CAGGAAAGAACATGTGAGCAAAAGGCCAGCAAAAGGCCAGGAACCGTAAAAAGGC  
CGCGTTGCTGGCGTTTTTCCATAGGCTCCGCCCCCTGACGAGCATCACAAAATC  
GACGCTCAAGTCAGAGGTGGCGAAACCCGACAGGACTATAAAGATAACCAGGCGTT  
TCCCCCTGGAAGCTCCCTCGTGCGCTCTCCTGTTCCGACCCTGCCGCTTACCGGAT  
ACCTGTCCGCTTTCTCCCTTCGGGAAGCGTGGCGCTTTCTCATAGCTCACGCTGT  
AGGTATCTCAGTTCGGTGTAGGTCGTTCCGCTCCAAGCTGGGCTGTGTGCACGAACC  
CCCCGTTCCAGCCGACCGCTGCGCCTTATCCGGTAACTATCGTCTTGAGTCCAACC  
CGGTAAGACACGACTTATCGCCACTGGCAGCAGCCACTGGTAACAGGATTAGCAGA  
GCGAGGTATGTAGGCGGTGCTACAGAGTTCTTGAAGTGGTGGCCTAACTACGGCTA  
CACTAGAAGGACAGTATTTGGTATCTGCGCTCTGCTGAAGCCAGTTACCTTCGGAA  
AAAGAGTTGGTAGCTCTTGATCCGGCAAACAAACCACCGCTGGTAGCGGTGGTTTTT  
TTGTTTGCAAGCAGCAGATTACGCGCAGAAAAAAGGATCTCAAGAAGATCCTTT

GATCTTTTCTACGGGGTCTGACGCTCAGTGGAACGAAAACCTCACGTTAAGGGATTT  
TGGTCATGAGATTATCAAAAAGGATCTTCACCTAGATCCTTTTAAATTA AAAATGAA  
GTTTTAAATCAATCTAAAGTATATATGAGTAAACTTGGTCTGACAGTTACCAATGCTT  
AATCAGTGAGGCACCTATCTCAGCGATCTGTCTATTTTCGTTTCATCCATAGTTGCCTG  
ACTCCCCGTCGTGTAGATAACTACGATACGGGAGGGCTTACCATCTGGCCCCAGTG  
CTGCAATGATACCGCGAGACCCACGCTCACCGGCTCCAGATTTATCAGCAATAAAC  
CAGCCAGCCGGAAGGGCCGAGCGCAGAAGTGGTCCTGCAACTTTATCCGCCTCCA  
TCCAGTCTATTAATTGTTGCCGGAAGCTAGAGTAAGTAGTTCCGCCAGTTAATAGTT  
TGCGCAACGTTGTTGCCATTGCTACAGGCATCGTGGTGTACGCTCGTCGTTTGGT  
ATGGCTTCATTCAGCTCCGGTTCCCAACGATCAAGGCGAGTTACATGATCCCCCAT  
GTTGTGCAAAAAAGCGGTTAGCTCCTTCGGTCCTCCGATCGTTGTCAGAAGTAAGT  
TGGCCGCAGTGTTATCACTCATGGTTATGGCAGCACTGCATAATTCTCTTACTGTCA  
TGCCATCCGTAAGATGCTTTTTCTGTGACTGGTGAGTACTCAACCAAGTCATTCTGA  
GAATAGTGTATGCGGCGACCGAGTTGCTCTTGCCCGGCGTCAATACGGGATAATAC  
CGCGCCACATAGCAGAACTTTAAAAGTGCTCATCATTGAAAACGTTCTTCGGGGC  
GAAAACCTCTCAAGGATCTTACCGCTGTTGAGATCCAGTTCGATGTAACCCACTCGT  
GCACCCAACTGATCTTCAGCATCTTTTACTTTTACCAGCGTTTCTGGGTGAGCAAA  
AACAGGAAGGCAAAATGCCGCAAAAAAGGGAATAAGGGCGACACGGAAATGTTGA  
ATACTCATACTCTTCCTTTTTCAATATTATTGAAGCATTATCAGGGTTATTGTCTCA  
TGAGCGGATACATATTTGAATGTATTTAGAAAAATAAACAAATAGGGGTTCCGCGCA  
CATTTCCCCGAAAAGTG

## **Supplementary Methods**

### **HE staining**

Eight-week-old testes and caudal epididymis of the *Morc3* homozygous mutant and wild type male mice were dissected and fixed in 4% paraformaldehyde for 2 h at 4°C. After washing in PBS containing 10% and 20% sucrose, they were embedded in OCT compound. The sections were stained with hematoxylin (Wako, Japan) and eosin. After staining, the sections were treated with ethanol and xylene. The image was obtained using the BZ-X710 microscope (Keyence, UK)

### **Immunoprecipitation, SDS-PAGE, and silver staining**

The E16.5 or 3-week-old testes of wild type and the mutant mice carrying the

*FLAG-NLS-ZFP* and *FLAG-NLS-ZFP-MIWI2* transgene were homogenized in a lysis buffer (20 mM Tris [pH 7.5], 150 mM KCl, 0.5% TritonX, 2.5 mM MgCl<sub>2</sub>, 1 mM DTT, RNasin (Promega), and a protease inhibitor tablet (Roche)). The lysates were freeze-thawed and treated with benzonase. The homogenates were centrifuged at 15000 × rpm for 10 min at 4°C and the supernatant was subjected to immunoprecipitation using anti-FLAG (FLA1; MBL) or MORC3 (D238-3; MBL, Japan) antibodies overnight at 4°C and protein G Dynabeads (Invitrogen, US) for 1.5 h at 4°C. The immune complex was washed with the lysis buffer three times. Immunoprecipitates were subjected to SDS-PAGE on a 7.5% gel. The gels were subjected to silver staining using the Silver Stain MS Kit (Wako, Japan) or western blotting.

The transfected 293T cells were treated with lysis buffer (20 mM HEPES [pH 7.5], 0.1% NP-40, 150 mM NaCl, 2.5 mM MgCl<sub>2</sub>, 1 mM DTT, and protease inhibitor tablet (Roche)). The lysates were precleared with Protein G Dynabeads (Invitrogen, US) for 1 h at 4°C and incubated with anti-PA antibody (Wako, Japan), anti-FLAG (FLA1; MBL) antibody, or anti-MILI (PM044; MBL) antibody overnight at 4°C. The immune complex was washed with the lysis buffer three times. The immunoprecipitates were subjected to western blotting.

### **Isolation of sperm**

Mouse sperm were isolated from the cauda epididymis of more than 10-week-old wild type (C57Bl/6) and the MORC3 mutant mice by dissecting tissue in PBS. Sperm were allowed to swim up for 30 min in 37°C with 5% CO<sub>2</sub>. To avoid the contamination of somatic cells, the upper fraction was collected for bisulfite sequence analysis.

### **Northern blot analysis**

Total RNA samples were prepared from testes using ISOGEN (Nippon Gene CO., LTD., Tokyo, Japan) and stained with 0.02% methylene blue. RNA Northern blot analysis was performed at 65°C in a solution containing 0.2 M NaHPO<sub>4</sub> (pH 7.2), 1 mM EDTA, 1% BSA, and 7% SDS. The membranes were washed with a 0.2 × SSC, 0.1% SDS solution at 65°C. The subcloned PCR products were labeled with [ $\alpha$ -<sup>32</sup>P]-dCTP and used as probes. The sequences used for the PCR primers were as follows: the 3' noncoding region of IAP (GenBank accession no. X04120), nucleotides 4489–4793, and the 5'

noncoding region of type A LINE-1 (M13002), nucleotides 531–1642 and type TF LINE-1(D84391), nucleotides 874–1156.

### **Immunohistochemical staining**

Testes of the *Morc3* homozygous and heterozygous mutant, wild type, and the *Mili* knockout male mice were dissected and fixed in 4% paraformaldehyde for 2 h at 4°C (for D30 after birth and 4-week-old testes), 2% paraformaldehyde overnight at 4°C (for 10-month-old testes), or 2% paraformaldehyde for 1 h at 4°C (for E14.5, 16.5, and 17.5 testes). After washing in PBS containing 10% and 20% sucrose, the testes were embedded in OCT compound. The cryosections blocked with 10% normal goat serum and 3% BSA in PBS for 0.5 h at room temperature were immunofluorescence stained, after treatment with HistoVT one (Nacalai Tesque Inc., Kyoto, Japan) for 4-week-old, 10-month-old, E16.5, and E17.5 testes. Sections were treated with anti-MORC3 antibody (D238-3; MBL, Japan), anti-MVH antibody (ab13840; abcam), anti-MILI antibody (#5940; Cell Signaling technology), anti-MIWI2 antibody (ab21869; abcam), anti-MIWI polyclonal antibody (#2079; Cell Signaling), or anti-LINE1 ORF1p antibody (ab216324; abcam) overnight at 4°C. Alexa Fluor 488- or 568-conjugated anti-rabbit immunoglobulins (H+L) or Alexa Fluor 488- or 568-conjugated anti-mouse immunoglobulins (H+L) (Molecular Probes, Eugene, OR, USA) were used as the secondary antibody for 1 h at room temperature. Nuclei were counterstained with 1 µg/mL DAPI. Immunostained cryosections were examined under a confocal microscope (LSM5Pascal, Carl Zeiss Co. Ltd).

### **Detection of small RNAs**

The detection of small RNAs from E16.5 testes of the *Morc3* homozygous mutant and wild type (control) mice using anti-MIWI2 and MILI antibodies were performed as described previously <sup>1</sup>.

### **ChIP-qPCR assay**

The E16.5 testes were removed and treated with 1 mg/mL collagenase type II and 0.25% trypsin for 5 min at 37°C. The germ cells were treated with 1% PFA for 8 min at room temperature. After quenching of the PFA crosslinking reaction with 0.2 M glycine, the fixed cells were washed with PBS. The fixed cells were suspended in lysis buffer (50 mM

Tris pH 7.5, 140 mM NaCl, 10  $\mu$ M EDTA, and 1% SDS) and sonicated to an average DNA fragment size of  $\sim$ 500 bps. After the addition of radio immunoprecipitation assay (RIPA) buffer (20 mM HEPES-NaOH [pH 7.5], 150 mM NaCl, 1 mM EDTA [pH 8], 1% NP-40, 0.5% deoxycholate, and 0.1% SDS), solubilized chromatin was clarified by centrifugation for 10 min at 15,000  $\times$  rpm at 4°C. The chromatin was incubated with anti-MORC3 antibody (D238-3; MBL, Japan) overnight at 4°C. Immune complexes were bound to Dynabeads protein G for 1.5 h at 4°C. The immune complexes bound to the beads were washed with RIPA buffer and Tris-EDTA. Immune complexes bound to protein G beads were suspended in elution buffer (20 mM Tris-HCl [pH 8], 300 mM NaCl, 1 mM EDTA, and 0.5% SDS) and incubated overnight at 65°C. After incubation, the samples were treated with 30  $\mu$ g/mL RNase A for 1 h at 37°C, and 100  $\mu$ g/mL proteinase K overnight at 56°C. DNA was extracted with phenol/chloroform and precipitated with ethanol and Dr. GentLE (Takara Bio, Shiga, Japan) as a carrier. Precipitated DNA was resuspended in 50  $\mu$ L water and analyzed by qPCR using the CFX384 Real-Time PCR system (BIO-RAD) with THUNDERBIRD SYBR qPCR MIX (TOYOBO, Osaka, Japan) and specific primers mentioned below.

### **Sperm morphology and motility**

Sperm morphology was observed and sperm motility was analyzed as described previously <sup>2</sup>.

### **Primer**

#### **(For Bisulfite sequencing)**

Primers Sequence (5' – 3') are as follows;

H19 (GenBank acc. no. U19619), product size: 423 bp

1st (outside) Forward: GAGTATTTAGGAGGTATAAGAATT

1st (outside) Reverse: ATCAAAAACATAAACCCT

2nd (inside) Forward: GTAAGGAGATTATGTTTATTTTGG

2nd (inside) Reverse: CCTCATTAATCCCATAACTAT

LINE-1(A) (GenBank acc. no. M13002), product size:  $\sim$ 310 bp

Forward: TTATTTTGATAGTAGAGTT Reverse: CAAACCAAACCTCCTAACAA

LINE-1(TF) (GenBank acc. no. D84391), product size:  $\sim$ 270 bp

Forward: GTTAGAGAATTTGATAGTTTTTGAATAGG

Reverse: CCAAACAAAACCTTTCTCAAACACTATAT

IAP, product size: 259 bp (ch3)

1st Forward: TAAGATAAAAGTTTGTAATGGTGGGAGAT

1st Reverse: ATTCTAAAATAAAATATCCCTCCTA

2nd Forward: AAATAAATTGTGGGAAGT

2nd Reverse: CAAAAAAAACACCACAAACCAAAT

**(For RT-qPCR)**

Primers Sequence (5' – 3') are as follows;

Chr 7(1)-1 Forward : AGGGGGCTGTAATGAGTTCC

Reverse : AACATCACGAGGTCCAAAGC

Chr 7(1)-2 Forward : AGCTGAAAGTGCCAGGTGCCTTC

Reverse : TAGAGCTCTATTGAGTTGAGATC

Chr 7(1)-3 Forward : CAAGGCATTGGTTTGCCACGTG

Reverse : ATGGCAAACCTAACTGAGGTG

Chr 7(1)-4 Forward : TGAGCATCCTTTCCCTCCTGGA

Reverse : CAAGACAAGCAGACAGATATG

Chr 7(1)-5 Forward : CAGGCATATGGCCATAGAGTA

Reverse : GAGAAGAGGGAACCTATACTGA

Chr 10-1 Forward : AGCGACAGGTTTTTCAGCGCTTC

Reverse : CTGCCCCGCACACAAGAGATC

Chr 10-2 Forward : CAGAGAGTTAGTGCAACGCTG

Reverse : ATTCAGCAGAAGGTTCTCCAG

Chr 10-3 Forward : ATGAAGGTGGCAGAACTCCA

Reverse : ACTGGCAACTCTTTTTGCCCTG

Chr 10-4 Forward : AGGGCAAAAAGAGTTGCCAGTC

Reverse : ATCGAGGCAAAACCTCTAGCA

Chr 10-5 Forward : AGACACGTGCAACTCTTACTT

Reverse : CGTGCATGGTATTTGCAGCTG

Chr 10-6 Forward : CCAGGTCTTCCTAGCACATC

Reverse : GACTCCCCTCCTGTGTGTGTG

Chr 8-1 Forward : AGTTCCTTTCAGGGGTTTTTAC

Reverse : TGCACAGAGAAAAGCTGGGTG

Chr 8-2 Forward : CAGCCAGATGCAGATTTATTTTT



Reverse : GCACATGGGTGAAGAAAGGT

Chr 7(2)-1 Forward : ACTATAGCCTAGCTTAGTGTG

Reverse : TCTGGGGTAGCTGACAGTGATC

Chr 7(2)-2 Forward : AACAGACTACAACCACTACTG

Reverse : CTATAAATTACTCAAGCAGGGTG

$\beta$ -actin Forward : CGGTTCCGATGCCCTGAGGCTCTT

Reverse : CGTCACACTTCATGATGGAATTGA

**(For ChIP-qPCR)**

Chr 7(1) promoter Forward : ACTCACCTGGCTCTCTGAAGGTTC

Reverse : GTTGCCCTAGTGCGCATGCGT

**(For genotyping)**

(For MORC3 ( $\Delta$ FRT) Detection) Primers Sequence (5' – 3') are as follows;

Forward : AGTTGCTTTCAGGTGGATTAC Reverse : TGCAATACCACCTGAAAGATG

(For MORC3 ( $\Delta$ loxP) Detection) Primers Sequence (5' – 3') are as follows;

Forward : GTATGCCACCAAATGTTCAAG Reverse : TGCAATACCACCTGAAAGATG

(For *Tnap-Cre* transgene Detection) Primers Sequence (5' – 3') are as follows;

Forward : GCATTACCGGTCGATGCAACGAGTGATGAG

Reverse : GAGTGAACGAACCTGGTCGAAATCAGTGCG

Reference

- 1 Kuramochi-Miyagawa, S. *et al.* DNA methylation of retrotransposon genes is regulated by Piwi family members MILI and MIWI2 in murine fetal testes. *Genes & development* **22**, 908-917, doi:10.1101/gad.1640708 (2008).
- 2 Miyata, H., Abbasi, F., Visconti, P. E. & Ikawa, M. CRISPR/CAS9-mediated amino acid substitution reveals phosphorylation residues of RSPH6A are not essential for male fertility in micedagger. *Biol Reprod* **103**, 912-914, doi:10.1093/biolre/ioaa161 (2020).

## Supplementary Figure and Item legends

### Supplementary Figure S1

#### MORC3 as an interaction partner of MIWI2

- (a) Full-length gel of Figure 1a.
- (b) Full-length blots of Figure 1b.
- (c) Full-length blots of Figure 1c.
- (d-i) Full-length blots of Figure 1d.
- (j) *In vitro* co-IP assays for MILI and MORC3. HEK 293T cells were transfected with the plasmids expressing Myc-His-tagged MILI and Flag-tagged MORC3. The 293T cells were co-transfected with the tagged protein expression constructs. The lysates were immunoprecipitated with the anti-MILI or anti-Flag antibodies and subsequently subjected to western blotting with these antibodies. Each of IP : MILI, IP : Flag, and input samples was run on the same gel and transferred. Uncropped blots were shown in Supplementary Figure S1k.
- (k) Full-length blots of Supplementary Figure S1j.
- (l) Co-immunostaining of the testes of the E17.5 wild type mice with the anti-MORC3 antibody (red), anti-MIWI2 antibody (green), and DAPI (blue) for DNA are shown. Scale bar, 20  $\mu\text{m}$ .

### Supplementary Figure S2

#### Conditional gene-targeted disruption of *Morc3* by *Cre-loxP* system

- (a) PCR genotyping of 12-day-old *Morc3* gene-targeted male germ cells purified by the anti-EpCAM antibody.
- (b) Co-immunostaining of the testes of the E14.5 wild type and MORC3-cKO mice with the anti-MORC3 antibody (red), anti-MVH antibody (green), and DAPI (blue) for DNA are shown. Scale bar, 50  $\mu\text{m}$ .
- (c) Co-immunostaining of the testes of the 30-day-old MORC3-heterozygous and the mutant mice with the anti-MORC3 antibody (red), anti-MIWI antibody (green), and DAPI (blue) for DNA are shown. Scale bar, 100  $\mu\text{m}$ .
- (d) Spermatozoa from the cauda epididymis.
- (e) Percentage of motile spermatozoa. No significant differences were found (by *f*test). N=3. Error bars denote standard deviation (SD).

(f) Velocity parameters of spermatozoa. There were no significant differences in all the parameters (by *t*-test). N=3. VAP = average path velocity, VSL = straight line velocity, VCL = curvilinear velocity. Error bars denote standard deviation (SD).

(g) The results of the mating test using wild type female mice coupled with MORC3-cKO or wild type adult male mice. The number of plug and delivery in using each MORC3-cKO adult male mouse is described. Litter size is the number of pups in each delivery.

#### Supplementary Figure S3

Supplementary figures of uncropped northern blots and co-immunostaining of the testes of the E17.5 MORC3-heterozygous and the mutant mice.

(a-d) Northern blots featured in Figure 3a.

(e) Co-immunostaining of the testes of the E17.5 MORC3-heterozygous and the mutant mice with the anti-MORC3 antibody (red), anti-LINE1-ORF1p antibody (green), and DAPI (blue) for DNA are shown. Scale bar, 20  $\mu$ m.

#### Supplementary Figure S4

Small RNAs in the embryonic MORC3 mutant testes

(a) Expression of micro RNAs (miRNAs) in the wild type and MORC3 mutant embryonic testes.

(b and c) Western blotting analysis of the immunoprecipitated proteins using the anti-MIWI2 and -MILI antibodies from testis lysates of E16.5 wild type and MORC3-cKO mice. Each of IP : MIWI2 and IP : MILI samples was run on the same gel and transferred (b). The samples of IP : MIWI2, IP : MILI, and input were run on the same gel and transferred (c). Uncropped western blots were shown at bottom. The immunoprecipitated RNAs were used for radiolabeled piRNA assay in Figure 5a (b) and deep-sequencing analysis (c).

(d) Full-length images of Figure 5a.

(e) Length distribution of MIWI2- and MILI-associated 25–31 nt small RNAs derived from each strand (sense or antisense) in E16.5 wild type and MORC3-cKO testes.

(f) Nucleotide distribution of the 1<sup>st</sup> or 10<sup>th</sup> nucleotide of piRNAs from each strand in MIWI2- and MILI-associated piRNA libraries from wild type and MORC3-cKO testes.

(g) Co-immunostaining of the testes of the E16.5 MORC3-heterozygous and the mutant

mice with anti-MIWI2 antibody (red), anti-MORC3 antibody (green), and DAPI (blue) for DNA are shown. The nucleus is surrounded by a white line. Scale bar, 20  $\mu$ m.

(h) Co-immunostaining of the testes of the E16.5 MORC3-heterozygous and the mutant mice with anti-MILI antibody (red), anti-MORC3 antibody (green), and DAPI (blue) for DNA are shown. Scale bar, 20  $\mu$ m.

#### Supplementary Figure S5

Expression of piRNA precursors from representative embryonic piRNA clusters

(a and b) Structure of the piRNA clusters (Chr 8 and Chr 7 (2)) and positions of individual primer set (upper). The region of IAP sequence in Chr 7 (2) cluster is described with red bars. Quantitative RT-PCR for the expression analysis of piRNA precursors transcribed from embryonic piRNA clusters using E16.5 wild type and MORC3-cKO embryonic testes (bottom). Data is normalized to  $\beta$ -actin and is shown as means and SD (Error bar) from more than triplicate PCR reactions. Significant differences (\* $p < 0.05$  by the  $t$  test) between wild type and MORC3-cKO data using primer sets for the Chr 8-1 and 2 positions are shown (a).

(c) ChIP-qPCR analysis of E16.5 wild type embryonic testis with anti-MORC3 antibody. The embryonic testis lysates were chromatin-immuno-precipitated with control IgG and anti-MORC3 antibody. N=3. The promoter region of Chr 7 (1) piRNA cluster was analyzed. Error bars denote standard deviation (SD). The asterisk shows statistically significant differences ( $p < 0.01$  by  $t$ -test).

#### Supplementary Figure S6

A gene-targeting construct for *Morc3*

Exons are shown as filled boxes and *loxP* and *FRT* sites as empty arrowheads and black arrows. The resultant allele lacks exon 2 (containing a part of Histidine kinase/HSP90-like ATPase superfamily domain).

#### Supplementary Item S1

The DNA sequence of the targeting vector (pDTMorc3neo)

The sequences of the vector (pDT), *loxP*, exon 2, and *FRT* are shown in red, blue, green, and pink, respectively.
